# Supplementary material for: ChIATAC is an efficient strategy for multi-omics mapping of 3D epigenomes from low-cell inputs
Source: PubMed Central journal article supplement (PMC9839710; doi:10.1038/s41467-023-35879-5), 2023-01-13
Supplement: 41467_2023_35879_MOESM3_ESM.pdf [file 41467_2023_35879_MOESM3_ESM.pdf]

**Title: Supplementary Data 1**

**Description:** Output of diffTF analysis for assessing the differential chromatin accessibility and gene expression during the cell-state transition in CD4<sup>+</sup> T cells.
